# Supplementary material for: Contrast-induced encephalopathy after an embolization procedure for a cerebral aneurysm in a female with subarachnoid hemorrhage: a case report
Source: Springer Nature journal article supplement (doi:10.1186/s12883-024-03530-5), 2024-01-23
Supplement: MOESM1 [file 26654276]

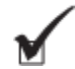

| Topic                                | Item | Checklist item description                                                                                       | Reported on Line                                                    |
|--------------------------------------|------|------------------------------------------------------------------------------------------------------------------|---------------------------------------------------------------------|
| Title                                | 1    | The diagnosis or intervention of primary focus followed by the words "case report" . . . . .                     | Line 2                                                              |
| Key Words                            | 2    | 2 to 5 key words that identify diagnoses or interventions in this case report, including "case report" . . .     | Line 52-53                                                          |
| Abstract<br>(no references)          | 3a   | Introduction: What is unique about this case and what does it add to the scientific literature? . . . . .        | Line 35-37                                                          |
|                                      | 3b   | Main symptoms and/or important clinical findings . . . . .                                                       | Line 43-45                                                          |
|                                      | 3c   | The main diagnoses, therapeutic interventions, and outcomes . . . . .                                            | Line 45-47                                                          |
|                                      | 3d   | Conclusion—What is the main "take-away" lesson(s) from this case? . . . . .                                      | Line 48-50                                                          |
| Introduction                         | 4    | One or two paragraphs summarizing why this case is unique ( <b>may include references</b> ) . . . . .            | Line 61-70                                                          |
| Patient Information                  | 5a   | De-identified patient specific information. . . . .                                                              | Line 73                                                             |
|                                      | 5b   | Primary concerns and symptoms of the patient. . . . .                                                            | Line 73-74; Line 87-90                                              |
|                                      | 5c   | Medical, family, and psycho-social history including relevant genetic information . . . . .                      | Line 74-75                                                          |
|                                      | 5d   | Relevant past interventions withoutcomes . . . . .                                                               | Line 77-78                                                          |
| Clinical Findings                    | 6    | Describe significant physical examination (PE) and important clinical findings. . . . .                          | Line 75-83; Line 88-92                                              |
| Timeline                             | 7    | Historical and current information from this episode of care organized as a timeline . . . . .                   | Line 85-108                                                         |
| Diagnostic Assessment                | 8a   | Diagnostic testing (such as PE, laboratory testing, imaging, surveys). . . . .                                   | Line 89-92                                                          |
|                                      | 8b   | Diagnostic challenges (such as access to testing, financial, or cultural) . . . . .                              | Line 92-93                                                          |
|                                      | 8c   | Diagnosis (including other diagnoses considered) . . . . .                                                       | Line 93                                                             |
|                                      | 8d   | Prognosis (such as staging in oncology) where applicable . . . . .                                               | N/A                                                                 |
| Therapeutic Intervention             | 9a   | Types of therapeutic intervention (such as pharmacologic, surgical, preventive, self-care) . . . . .             | Line 93-95; Line 99-104                                             |
|                                      | 9b   | Administration of therapeutic intervention (such as dosage, strength, duration) . . . . .                        | Line 93-94; Line 99-100                                             |
|                                      | 9c   | Changes in therapeutic intervention (with rationale) . . . . .                                                   | Line 99-105                                                         |
| Follow-up and Outcomes               | 10a  | Clinician and patient-assessed outcomes (if available) . . . . .                                                 | Line 105-106                                                        |
|                                      | 10b  | Important follow-up diagnostic and other test results . . . . .                                                  | Line 107-108                                                        |
|                                      | 10c  | Intervention adherence and tolerability (How was this assessed?) . . . . .                                       | N/A                                                                 |
|                                      | 10d  | Adverse and unanticipated events . . . . .                                                                       | N/A                                                                 |
| Discussion                           | 11a  | A scientific discussion of the strengths AND limitations associated with this case report . . . . .              | Line 155-157; Line 165-169                                          |
|                                      | 11b  | Discussion of the relevant medical literature <b>with references</b> . . . . .                                   | Line 111-175                                                        |
|                                      | 11c  | The scientific rationale for any conclusions (including assessment of possible causes) . . . . .                 | Line 136-141; Line 155-158                                          |
|                                      | 11d  | The primary "take-away" lessons of this case report (without references) in a one paragraph conclusion . . . . . | Line 176-183                                                        |
| Patient Perspective Informed Consent | 12   | The patient should share their perspective in one to two paragraphs on the treatment(s) they received . . . . .  | N/A                                                                 |
|                                      | 13   | Did the patient give informed consent? Please provide if requested . . . . .                                     | Yes <input checked="" type="checkbox"/> No <input type="checkbox"/> |
